# Supplementary material
Source: HighWire-hosted journal article supplement (https://delf06.com/highwire/filestream/93958/field_highwire_adjunct_files/0/Supplement_Data.pdf)
Supplement: Supplement_Data.pdf [file Supplement_Data.pdf]

## Research check list - Fredheim et al. 2011

### **Domain 1: Research team and reflexivity**

#### **Personal characteristics**

1. Interviewer/facilitator 1: Terje Fredheim
2. Credentials: Master of Learning in Complex Systems
3. Occupation: PhD-student
4. Gender: Male
5. Experience and training: Participated in earlier qualitative and quantitative research

1. Interviewer/facilitator 2: Kari Kjønberg
2. Credentials: Reg. nurse, MMHC
3. Occupation: Reg. nurse specialised in mental health care.
4. Gender: Female
5. Experience and training: Participated in different earlier qualitative health research studies.

#### **Relationship with participants**

6. Relationship established: There was no relationship prior to study commencement.
7. Participant knowledge of the interviewer: They were informed about researchers` professional background and interest in the project.
8. Interviewer characteristics: The interviewers` connection with specialised health care may be regarded as bias, but was considered as a minor problem.

### **Domain 2: Study design**

#### **Theoretical frame work**

9. Methodological orientation and theory: The study relies on a phenomenological approach with content analysis and systematic text condensation as the main method in analysing data.

#### **Participant selection**

10. Sampling: Names of possible participants were given the interviewers from habilitation services on specialised health care level. The interviewers then recruited strategically from this list to represent different gender, age, diagnosis and location (rural or city).
11. Method of approach: Participants were contacted by telephone. Information was given and request made, and appointment made with those who were positive.
12. Sample size: Nine participants were interviewed, representing seven children.
13. Non-participation: Two persons refused/hesitated to participate. No drop-outs. The reason for non-participation was not asked for.

#### **Setting**

14. Setting of data collection: Five interviews were conducted in the participants` own home, two in a meeting room at the researchers` working place, by the participants` own choice.
15. Presence of non-participants: None.
16. Description of sample: Seven females and two males were interviewed (parents). They represented seven children of various gender, age, location and health service offers.

### **Data collection**

17. Interview guide: A guide with themes and main questions was provided by the researchers and discussed with the supervisors. Also a checklist was used to get more information on topics that seemed important or topics not mentioned by the participant. No pilot was tested.
18. Repeat interviews: Repeated interviews were not used. Participants were encouraged to contact the interviewers if they wanted to add something and one of them made contact by telephone to give some more information.
19. Audio/visual recording: Audio recording was used to collect data.
20. Field notes: The two interviewers made field notes during the interviews, and immediately after each interview.
21. Duration: Interviews lasted 60 – 90 minutes.
22. Data saturation: Saturation was discussed in the research group after the seven interviews had been conducted and was then regarded as satisfactory.
23. Transcripts returned: Transcripts were not returned to participants for comment or corrections.

### **Domain 3. Analysis and findings**

#### **Data analysis**

24. Number of data coders: All five in the research group read the complete transcript. One of the interviewers presented identified meaningful units and themes derived from the material and they were discussed in the research group.
25. Description of the coding tree: The coding tree is illustrated with a figure of major and minor themes.
26. Derivation of themes: Themes emerged from the data.
27. Software: No additional software was used.
28. Participant checking: Participants were offered feedback on the findings. Two of them expressed a request for feedback.

#### **Reporting**

29. Quotations presented: Participant quotations were used to illustrate findings. Quotations are not identified in this paper due to a small number of participants.
30. Data and findings consistent: The themes developed by the researcher(s) were logically consistent and reflective of the data.
31. Clarity of major themes: The major themes are described in the article, and reflect the research question.
32. Clarity of minor themes: Minor themes are described in the article, and reflect meaningful units. Diverse cases are described where necessary.
